# Supplementary material
Source: Springer Nature journal article supplement (https://www.springermedizin.de/resource/supplementary/12872_2010_302_MOESM2_ESM.pdf/9429650)

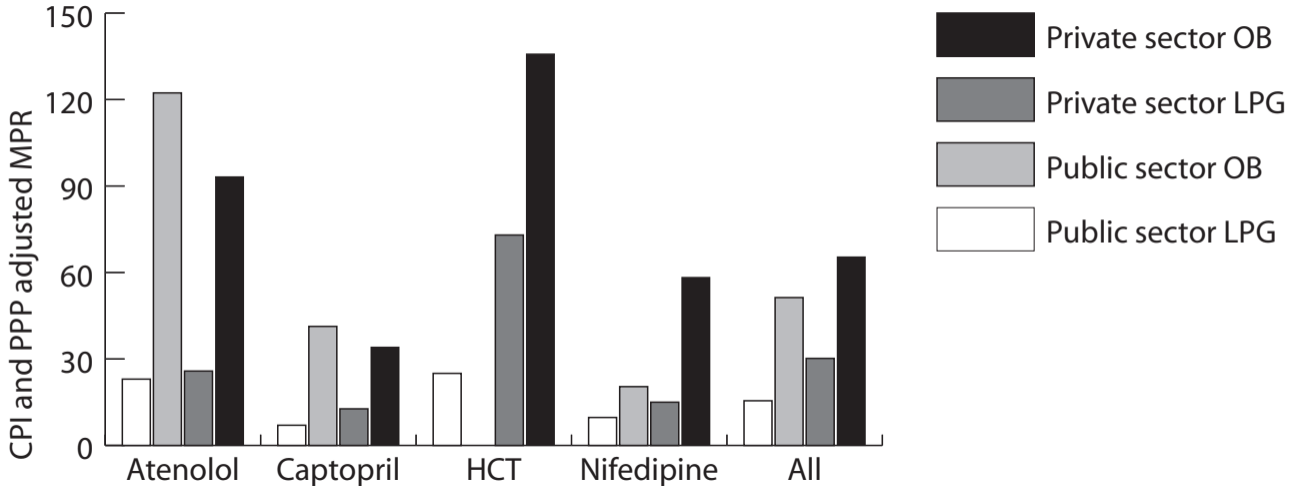

Supplement: MOESM2 [file 9429650]
